# Supplementary material
Source: PubMed Central journal article supplement (PMC2804350)

Supplemental Table S1: Oligonucleotide primers<sup>1</sup> for site-directed mutagenesis of canine RPE65

| Mutant | Forward primer <sup>2</sup>                  | Reverse primer <sup>2</sup>                   |
|--------|----------------------------------------------|-----------------------------------------------|
| F61L   | CTGAACCATTTTACCACCTGTTAGACGGACAAGCC          | GGCTTGTCCTGCTAACAGGTGGTAAAATGGTTCAG           |
| F61Y   | ATCTGAACCATTTTACCACCTGTATGACGGACAAGC         | GCTTGTCCTGCATACAGGTGGTAAAATGGTTCAGAT          |
| F61W   | GAACCATTTTACCACCTGTGGGACGGACAAGCCCTTCTGC     | GCAGAAGGGCTTGTCCTGCCACAGGTGGTAAAATGGTTC       |
| Y275F  | GTCTTTGGGGAGCCAACCTTCATGGATTGTTTTGAGTC       | GACTCAAAAACAATCCATGAAGTTGGCTCCCCAAAAGAC       |
| Y275W  | AGTCTTTGGGGAGCCAACCTGGATGGATTGTTTTGAGTCCA    | TGGACTCAAAAACAATCCATCCAGTTGGCTCCCCAAAAGACT    |
| Y275I  | GAGTCTTTGGGGAGCCAACATCATGGATTGTTTTGAGTCC     | GGACTCAAAAACAATCCATGATGTTGGCTCCCCAAAAGACT     |
| Y239W  | GACCGATTCAAGCCATCGTGGGTCCATAGTTTTGGTTTGA     | TCAAACCAAAAACCTATGGACCCACGATGGCTTGAATCGGTC    |
| Y239F  | CGATTCAAGCCATCGTTCGTCCATAGTTTTGGTTTG         | CAAACCAAAAACCTATGGACGAACGATGGCTTGAATCG        |
| Y239L  | CGATTCAAGCCATCGCTCGTCCATAGTTTTGGTTTG         | CAAACCAAAAACCTATGGACGAGCGATGGCTTGAATCG        |
| Y239S  | CGATTCAAGCCATCGTCCGTCCATAGTTTTGGTTTG         | CAAACCAAAAACCTATGGACGGACGATGGCTTGAATCG        |
| Y239T  | CGATTCAAGCCATCGACCGTCCATAGTTTTGGTTTG         | CAAACCAAAAACCTATGGACGGTCGATGGCTTGAATCG        |
| Y239C  | CGATTCAAGCCATCGTGCCTCCATAGTTTTGGTTTG         | CAAACCAAAAACCTATGGACGCACGATGGCTTGAATCG        |
| Y239D  | CGATTCAAGCCATCGGACGTCCATAGTTTTGGTTTG         | CAAACCAAAAACCTATGGACGTCCGATGGCTTGAATCG        |
| W331Y  | GTGGATCTCTGCTGCTACAAAGGATTTGAATTC            | GAATTCAAATCCTTTGTCGCAGCAGAGATCCAC             |
| W331F  | GTGGATCTCTGCTGCTTCAAAGGATTTGAATTC            | GAATTCAAATCCTTTGAAGCAGCAGAGATCCAC             |
| W331L  | GTGGATCTCTGCTGCTTGAAAGGATTTGAATTC            | GAATTCAAATCCTTTCAAGCAGCAGAGATCCAC             |
| W331Q  | GTGGATCTCTGCTGCCAGAAAGGATTTGAATTC            | GAATTCAAATCCTTTCTGGCAGCAGAGATCCAC             |
| T147W  | GATTACTATGCCTGCTGGGAGACCAACTTCATTAC          | GTAATGAAGTTGGTCTCCAGCAGGCATAGTAATC            |
| T147Y  | GATTACTATGCCTGCTACGAGACCAACTTCATTAC          | GTAATGAAGTTGGTCTCGTAGCAGGCATAGTAATC           |
| T147V  | GGGAAGATTACTATGCCTGCGTGAGACCAACTTCATTACAA    | TTGTAATGAAGTTGGTCTCCACGAGGCATAGTAATCTTCCC     |
| T147A  | GAAGATTACTATGCCTGCGCGGAGACCAACTTCATTA        | TAATGAAGTTGGTCTCCGCGCAGGCATAGTAATCTTC         |
| T147C  | GGGAAGATTACTATGCCTGCTGCGAGACCAACTTCATTACAAAG | CTTTGTAATGAAGTTGGTCTCGCAGCAGGCATAGTAATCTTCCCC |
| T147G  | GGAAGATTACTATGCCTGCGGGGAGACCAACTTCATTACA     | TGTAATGAAGTTGGTCTCCCCGAGGCATAGTAATCTTCC       |
| T147S  | GATTACTATGCCTGCAGCGAGACCAACTTCATTAC          | GTAATGAAGTTGGTCTCGCTGCAGGCATAGTAATC           |
| F103W  | GAGAAAAGGATCGTCATAACGGAATGGGGCACCTGTGCGT     | ACGCACAGGTGCCCATTCGGTTATGACGATCCTTTTCTC       |
| F103Y  | GAAAAGGATCGTCATAACGGAATATGGCACCTGTGC         | GCACAGGTGCCATATTCGGTTATGACGATCCTTTTC          |
| F103I  | GAAAAGGATCGTCATAACGGAATATGGCACCTGTG          | CACAGGTGCCAATTTCCGTTATGACGATCCTTTTC           |
| F103L  | GAAAAGGATCGTCATAACGGAATATGGCACCTGTG          | CACAGGTGCCAAGTTCCGTTATGACGATCCTTTTC           |

<sup>1</sup>Predicted by QuikChange Primer Design Program (Stratagene division of Agilent Technologies)

<sup>2</sup>Primer sequences depicted in 5'-NNNN-3' orientation

## Supplemental Figure Legends

Fig. S1: MALDI-TOF analysis of retinol standards. A: All-*trans* retinol. The major mass of ~286 corresponds to intact all-*trans* retinol while the mass at ~287 is due to stochastic occurrence of  $^{13}\text{C}$ . The masses at ~269 and ~270 are due to loss of hydroxyl from the intact ~286 and ~287 masses. The masses at ~302 and ~303 are ascribed to epoxidation of the intact ~286 and ~287 masses. B: [ $^{15}\text{-}^2\text{H}$ ,  $^{18}\text{O}$ ]-all-*trans* retinol. The major mass of ~289 corresponds to intact labeled [ $^{15}\text{-}^2\text{H}$ ,  $^{18}\text{O}$ ]-all-*trans* retinol while the mass at ~290 is due to stochastic occurrence of  $^{13}\text{C}$ . The masses at ~270 and ~271 are due to loss of  $^{18}\text{O}$ -labeled hydroxyl ( $^{18}\text{OH}$ ) from the intact ~289 and ~290 masses. The extra 1 atomic mass unit, compared to masses ~269 and ~270 in A, is due to presence of  $^2\text{H}$  label, which is not lost from the retinol. The mass at ~305 is ascribed to epoxidation of the intact ~289 species. Method as described in Experimental Procedures.

Fig. S2: Structural model and alignment of RPE65 and ACO. A: Stereo-pair model of RPE65 based on ACO template. Mouse RPE65 was modeled on *Synechocystis* ACO using the Swiss-Pdb viewer with apocarotenal (yellow) mounted in the ACO substrate-binding cleft. RPE65 structure is in green, ACO in silver. The propeller structure is well-maintained in RPE65, but the loops forming the dome above the catalytic site are more extensive in RPE65 and thus cannot be modeled on this template. B: Sequence alignment of RPE65 and ACO to show residues studied (F61, F103, T147, Y239, Y275 and W331) highlighted in red. Initial alignment obtained with DeepView/Swiss-PdbViewer (v3.7) was manually adjusted to maximize both gap suppression and alignment with predicted structural features (beta sheets and alpha helices). Residues 338-375 of RPE65 are restricted to metazoan carotenoid oxygenase family members. \*=identity; .=similarity.

Fig. S3: Co-production of 11-*cis* and 13-*cis* retinols by RPE65. Data from Fig. 1B of Redmond et al. (8) were re-analyzed to extract 13-*cis* isomer information. Cultures were transfected with six different combinations: 1, pVitro2/RPE65+CRALBP; 2, pVitro2/RPE65 and pVitro3/LRAT+RDH5; 3, pVitro2/RPE65+CRALBP and pVitro3/LRAT+RDH5; 4, pVitro3/LRAT+RDH5; 5, pVitro2/CRALBP and pVitro3/LRAT+RDH5; and 6, no DNA. These were incubated with 2.5  $\mu\text{M}$  all-*trans* retinol, as described in (8).

# Supplemental Figure S1

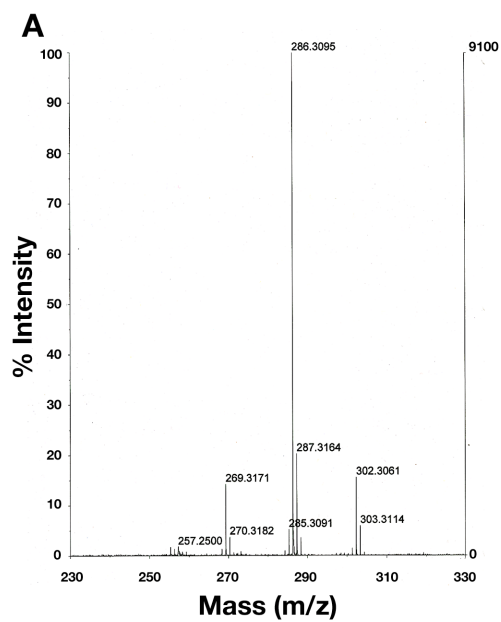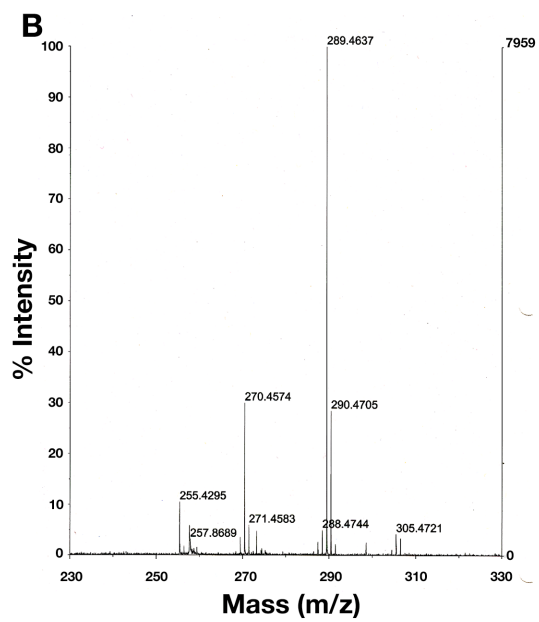

# Supplemental Fig. S2

## A

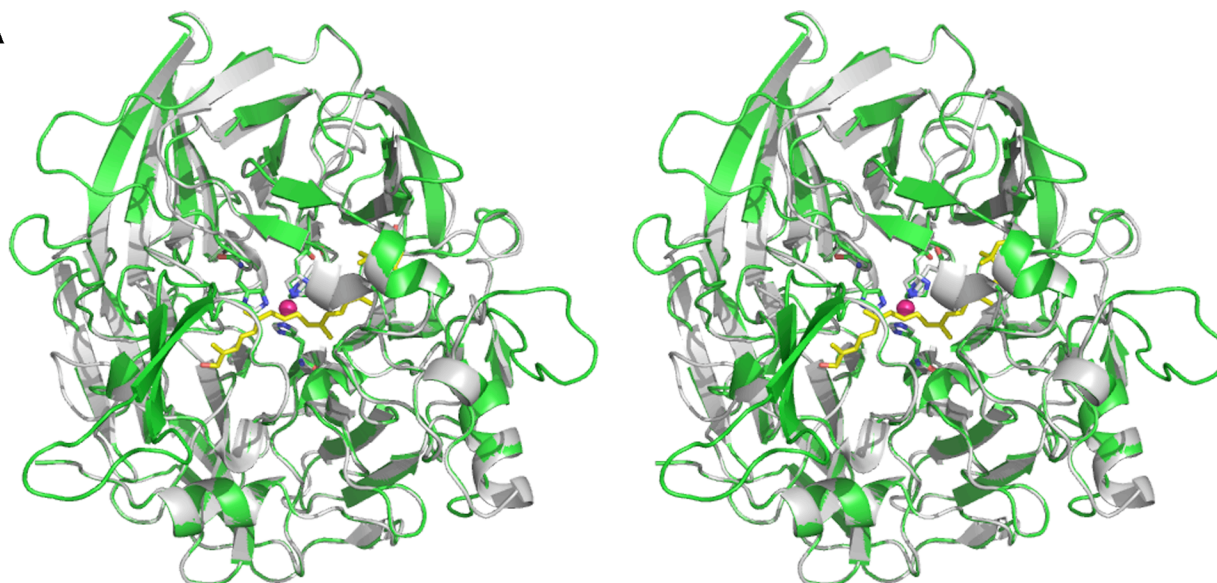

## B

|       |     |                         |                          |                         |                         |               |
|-------|-----|-------------------------|--------------------------|-------------------------|-------------------------|---------------|
| RPE65 | 1   | MSIQIEHPA               | GGYKFLFETV               | EELSSPLTAH              | VTGRIPLWLT              | GSLLRCPGL     |
| ACO   | 12  | QRSYSP                  | QDWLRGYQSQ               | PQEWYDVED               | VEGSI PDLQ              | GTLYRNGPGL    |
|       |     | *                       | ..                       | .                       | * * * * *               | * . * * * * * |
| RPE65 | 50  | FEVGSEPFYH              | LF <del>FD</del> GQALLHK | FD <del>FK</del> -EGHVT | YHRRFIRTD               | YVRAMTEKRI    |
| ACO   | 58  | LEIGDRPLKH              | P <del>FD</del> GDGMVTA  | FK <del>FP</del> GDGRVH | FQSKFVRTQ               | YVEEQKAGKM    |
|       |     | . * * * * *             | * * * * * *              | * * * * *               | . . . * * * * *         | * * * * * *   |
| RPE65 | 99  | VITE- <del>FG</del> TCA | FDPCKNIFS                | RFFSYFKGVE              | VTDNALVNI               | PVGEDYYACT    |
| ACO   | 108 | IYRGV <del>FG</del> SQP | AGGWLKTIFD               | LRLKNIAN--              | -T-----NIT              | YWGDRLLALW    |
|       |     | . * * * *               | . * * * *                | .                       | * * * * *               | * * * * *     |
| RPE65 | 148 | ETNFIKINP               | ETLETIKQVD               | LCNYISVNG-              | ATAHPHIESD              | GTVYNIGNCF    |
| ACO   | 150 | EGGQPHRLEP              | SNLATIGLDD               | LGGILAEQGP              | LSAHPRIDPA              | STFDGGQPCY    |
|       |     | * * * * *               | * * * * *                | * * * * *               | * * * * *               | * * * * *     |
| RPE65 | 197 | GKNFTVAYNI              | IKIPPLKADK               | EDPINKSEVV              | VQFPCSDRFK              | PSYVHSFGLT    |
| ACO   | 200 | VTFSIKSSLS              | STLTLELDDP               | -----QGKL               | LRQKTETFPG              | FAFIHDFAIT    |
|       |     | .                       | * * *                    | .                       | .                       | . . . * * * * |
| RPE65 | 247 | PNYIVFVETP              | VKINLKFCLS               | SWSLWGAN <del>YM</del>  | DCFESNESMG              | VWLHVADKKR    |
| ACO   | 244 | PHYAIFLQNN              | VTNLGLPYL-               | -FGLRGAG--              | ECVQFHPDKP              | AQIILVPRDG    |
|       |     | * * * * *               | * * * * *                | * * * * *               | * * * * *               | * * * * *     |
| RPE65 | 297 | RKYFNKRYRT              | SPFNLFHHIN               | TYEDNGFLIV              | DLCC <del>WK</del> GFEF | VYNYLYLANL    |
| ACO   | 290 | GEIKRIPVQ-              | -AGFVFHHAN               | AFEENGIIL               | DSIC <del>YN</del> SLPQ | V-----        |
|       |     | .                       | * * * * *                | * * * * *               | * * * * *               | * * * * *     |
| RPE65 | 347 | RENWEEVKRN              | AMKAPQPEVR               | RYVLPLTIDKV             | DTGRNLVTL               | PHTTATATLR    |
| ACO   | 328 | -----                   | -----                    | -----DT                 | DGDFRSTNF               | DNLDPGQLWR    |
|       |     | .                       | .                        | .                       | *                       | *             |
| RPE65 | 397 | SDETIWLEPE              | VLFSGPRQAF               | EFFQINYQKF              | GKPYTYAYG               | LGLNH----F    |
| ACO   | 350 | FTIDPAAATV              | EKQLMVSRC                | EFFVVPQOV               | G-RPYRYVYM              | GAHHSTGNA     |
|       |     | .                       | .                        | * * * * *               | * * * * *               | * * * * *     |
| RPE65 | 443 | VPDKLCKMNV              | KT-KEIWMWQ               | EPDSYPSEPI              | FVSQPDAL                | DDGVVLSVVV    |
| ACO   | 399 | PLQAILKVDL              | ESGTETLSF                | APHGFAGEPI              | FVPRPGVAE               | DDGWLLCLII    |
|       |     | . . . * * * *           | .                        | * * * * *               | * * * * *               | * * * * *     |
| RPE65 | 492 | SPGAGQKPAY              | LLVLNAKDLS               | EIARAQVETN              | IPVTFHGLFK              | RS            |
| ACO   | 449 | KADLHRSELV              | ILDAQDITAP               | AIATLKLKHH              | IPYPLHGSWA              | QT            |
|       |     | .                       | * * *                    | * * * * *               | * * * * *               | * * * * *     |

Supplemental Figure S3

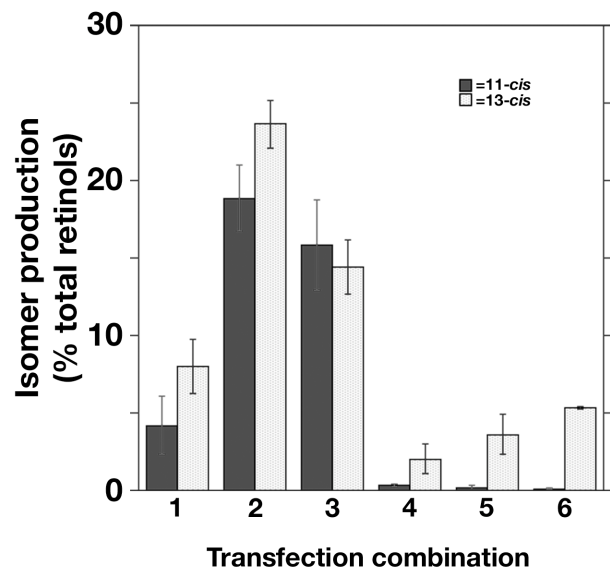

Supplement: supp_M109.027458_jbc.M109.027458-1.pdf [file supp_M109.027458_jbc.M109.027458-1.pdf]
